# Supplementary material for: Humoral immune response after different SARS-CoV-2 vaccination regimens
Source: Springer Nature journal article supplement (doi:10.1186/s12916-021-02231-x), 2022-01-21
Supplement: MOESM1 [file 20056360]

**Table S1:** Vaccine-induced humoral immunity. Anti-SARS-CoV-2 immunoglobulin G (IgG) response after first and second immunisation with the vector vaccine AZD1222 or the messenger ribonucleic acid (mRNA)-based vaccines BNT162b2 and mRNA-1273. The IgG concentration is given in Binding Antibody Units (BAU) per ml. The median and the 95% confidence intervals (CI) were calculated for each group. The table also contains the anti-SARS-CoV-2 IgG avidity results. Furthermore, the virus neutralising titres determined in the surrogate neutralisation test (sVNT) or in the Vero-cell based virus neutralisation test (cVNT) using a B.1.1.7 (alpha) or B.1.617.2 (delta) strain as antigens are given.

|                                    | AZD1222 heterologous 1 <sup>st</sup> vaccination | AZD1222 heterologous 2 <sup>nd</sup> vaccination | AZD1222 homologous 1 <sup>st</sup> vaccination | AZD1222 homologous 2 <sup>nd</sup> vaccination | BNT162b2 homologous 1 <sup>st</sup> vaccination | BNT162b2 homologous 2 <sup>nd</sup> vaccination |
|------------------------------------|--------------------------------------------------|--------------------------------------------------|------------------------------------------------|------------------------------------------------|-------------------------------------------------|-------------------------------------------------|
| <b>Number of tested sera</b>       | 30                                               | 42                                               | 8                                              | 9                                              | 8                                               | 8                                               |
| <b>anti-trimeric S IgG</b>         |                                                  |                                                  |                                                |                                                |                                                 |                                                 |
| Minimum (BAU/ml)                   | 17                                               | 480                                              | 34                                             | 131                                            | 168                                             | 4030                                            |
| 25% Percentile (BAU/ml)            | 32                                               | 1973                                             | 49                                             | 267                                            | 312                                             | 5693                                            |
| Median (BAU/ml)                    | 59                                               | 3750                                             | 72                                             | 424                                            | 428                                             | 6240                                            |
| 75% Percentile (BAU/ml)            | 125                                              | 7280                                             | 182                                            | 656                                            | 551                                             | 8200                                            |
| Maximum (BAU/ml)                   | 517                                              | 10400                                            | 274                                            | 811                                            | 835                                             | 9010                                            |
| 95%CI median, lower limit (BAU/ml) | 39                                               | 2460                                             | 34                                             | 146                                            | 168                                             | 4030                                            |
| 95%CI median, upper limit (BAU/ml) | 107                                              | 6170                                             | 274                                            | 729                                            | 835                                             | 9010                                            |
| <b>anti-S IgG</b>                  |                                                  |                                                  |                                                |                                                |                                                 |                                                 |
| Minimum (BAU/ml)                   | 7                                                | 68                                               | 6                                              | 58                                             | 48                                              | 1011                                            |
| 25% Percentile (BAU/ml)            | 14                                               | 619                                              | 15                                             | 79                                             | 71                                              | 1093                                            |
| Median (BAU/ml)                    | 21                                               | 783                                              | 22                                             | 123                                            | 126                                             | 1334                                            |
| 75% Percentile (BAU/ml)            | 45                                               | 1328                                             | 71                                             | 190                                            | 166                                             | 1589                                            |
| Maximum (BAU/ml)                   | 226                                              | 2024                                             | 116                                            | 299                                            | 272                                             | 2002                                            |
| 95%CI median, lower limit (BAU/ml) | 17                                               | 676                                              | 6                                              | 76                                             | 48                                              | 1011                                            |
| 95%CI median, upper limit (BAU/ml) | 40                                               | 1213                                             | 116                                            | 203                                            | 272                                             | 2002                                            |
| <b>anti-RBD IgG</b>                |                                                  |                                                  |                                                |                                                |                                                 |                                                 |
| Minimum (BAU/ml)                   | 7                                                | 513                                              | 7                                              | 78                                             | 59                                              | 2470                                            |
| 25% Percentile (BAU/ml)            | 17                                               | 1249                                             | 18                                             | 116                                            | 65                                              | 2993                                            |
| Median (BAU/ml)                    | 31                                               | 1859                                             | 36                                             | 157                                            | 139                                             | 3195                                            |
| 75% Percentile (BAU/ml)            | 60                                               | 3141                                             | 82                                             | 380                                            | 232                                             | 3715                                            |
| Maximum (BAU/ml)                   | 239                                              | 4795                                             | 187                                            | 462                                            | 638                                             | 4676                                            |
| 95%CI median, lower limit (BAU/ml) | 19                                               | 1404                                             | 7                                              | 98                                             | 59                                              | 2470                                            |
| 95%CI median, upper limit (BAU/ml) | 53                                               | 2927                                             | 187                                            | 439                                            | 638                                             | 4676                                            |
| <b>IgG-Avidity†</b>                |                                                  |                                                  |                                                |                                                |                                                 |                                                 |
| Number of tested sera              | 30                                               | 36                                               | 8                                              | 7                                              | 8                                               | 7                                               |
| IgG avidity index 0 - 2            | 24                                               | 0                                                | 6                                              | 0                                              | 7                                               | 0                                               |
| IgG avidity index 3                | 6                                                | 36                                               | 2                                              | 7                                              | 1                                               | 7                                               |
| <b>sVNT</b>                        |                                                  |                                                  |                                                |                                                |                                                 |                                                 |
| Number of tested sera              | 30                                               | 42                                               | 8                                              | 9                                              | 8                                               | 8                                               |
| Minimum (% inhibition)             | 6                                                | 99                                               | 0                                              | 78                                             | 28                                              | 99                                              |

|                                          | <b>AZD1222 heterologous 1<sup>st</sup> vaccination</b> | <b>AZD1222 heterologous 2<sup>nd</sup> vaccination</b> | <b>AZD1222 homologous 1<sup>st</sup> vaccination</b> | <b>AZD1222 homologous 2<sup>nd</sup> vaccination</b> | <b>BNT162b2 homologous 1<sup>st</sup> vaccination</b> | <b>BNT162b2 homologous 2<sup>nd</sup> vaccination</b> |
|------------------------------------------|--------------------------------------------------------|--------------------------------------------------------|------------------------------------------------------|------------------------------------------------------|-------------------------------------------------------|-------------------------------------------------------|
| 25% Percentile (% inhibition)            | 17                                                     | 100                                                    | 15                                                   | 89                                                   | 39                                                    | 100                                                   |
| Median (% inhibition)                    | 42                                                     | 100                                                    | 25                                                   | 98                                                   | 67                                                    | 100                                                   |
| 75% Percentile (% inhibition)            | 56                                                     | 100                                                    | 59                                                   | 99                                                   | 75                                                    | 100                                                   |
| Maximum (% inhibition)                   | 94                                                     | 100                                                    | 91                                                   | 100                                                  | 97                                                    | 100                                                   |
| 95%CI median, lower limit (% inhibition) | 20                                                     | 100                                                    | 0                                                    | 86                                                   | 28                                                    | 99                                                    |
| 95%CI median, upper limit (% inhibition) | 47                                                     | 100                                                    | 91                                                   | 99                                                   | 97                                                    | 100                                                   |
| <b>cVNT (alpha)</b>                      |                                                        |                                                        |                                                      |                                                      |                                                       |                                                       |
| Minimum (titre)                          | <1:10                                                  | 1:57                                                   | <1:10                                                | <1:10                                                | <1:10                                                 | 1:226                                                 |
| 25% Percentile (titre)                   | <1:10                                                  | 1:320                                                  | <1:10                                                | 1:30                                                 | <1:10                                                 | 1:283                                                 |
| Median (titre)                           | 1:3 <sup>†</sup>                                       | 1:640                                                  | 1:7 <sup>†</sup>                                     | 1:57                                                 | <1:10                                                 | 1:640                                                 |
| 75% Percentile (titre)                   | 1:10                                                   | 1:1280                                                 | 1:13                                                 | 1:160                                                | 1:11                                                  | 1:839                                                 |
| Maximum (titre)                          | 1:20                                                   | 1:1280                                                 | 1:20                                                 | 1:226                                                | 1:57                                                  | 1:1280                                                |
| 95% CI of median, lower limit (titre)    | <1:10                                                  | 1:453                                                  | <1:10                                                | 1:20                                                 | <1:10                                                 | 1:226                                                 |
| 95% CI of median, upper limit (titre)    | 1:10                                                   | 1:1280                                                 | 1:20                                                 | 1:160                                                | 1:57                                                  | 1:1280                                                |
|                                          |                                                        |                                                        |                                                      |                                                      |                                                       |                                                       |
| <b>cVNT</b>                              | <b>AZD1222 heterologous 2<sup>nd</sup> vaccination</b> |                                                        | <b>AZD1222 homologous 2<sup>nd</sup> vaccination</b> |                                                      | <b>BNT162b2 homologous 2<sup>nd</sup> vaccination</b> |                                                       |
| <b>Variant of SARS-CoV-2</b>             | <b>alpha</b>                                           | <b>delta</b>                                           | <b>alpha</b>                                         | <b>delta</b>                                         | <b>alpha</b>                                          | <b>delta</b>                                          |
| Number of tested sera                    | 9                                                      | 9                                                      | 9                                                    | 9                                                    | 8                                                     | 8                                                     |
| Minimum (titre)                          | 1:113                                                  | 1:57                                                   | <1:10                                                | <1:10                                                | 1:226                                                 | 1:57                                                  |
| 25% Percentile (titre)                   | 1:773                                                  | 1:68                                                   | 1:30                                                 | 1:2                                                  | 1:283                                                 | 1:100                                                 |
| Median (titre)                           | 1:1280                                                 | 1:80                                                   | 1:57                                                 | 1:20                                                 | 1:640                                                 | 1:160                                                 |
| 75% Percentile (titre)                   | 1:1280                                                 | 1:113                                                  | 1:160                                                | 1:24                                                 | 1:839                                                 | 1:297                                                 |
| Maximum (titre)                          | 1:1280                                                 | 1:160                                                  | 1:226                                                | 1:40                                                 | 1:1280                                                | 1:320                                                 |
| 95% CI of median, lower limit (titre)    | 1:640                                                  | 1:57                                                   | 1:20                                                 | <1:10                                                | 1:226                                                 | 1:57                                                  |
| 95% CI of median upper limit (titre)     | 1:1280                                                 | 1:113                                                  | 1:160                                                | 1:28                                                 | 1:1280                                                | 1:320                                                 |

† The avidity of the anti-SARS-CoV-2 IgG was not tested in all sera. For example, if an individual already presented highly avid IgG antibodies after the first vaccination, the avidity was not determined again after the second vaccination.

Titres <1:10 and ≤1:10 were included in the statistics as log(1) and log(3.2) respectively for mathematical reasons.

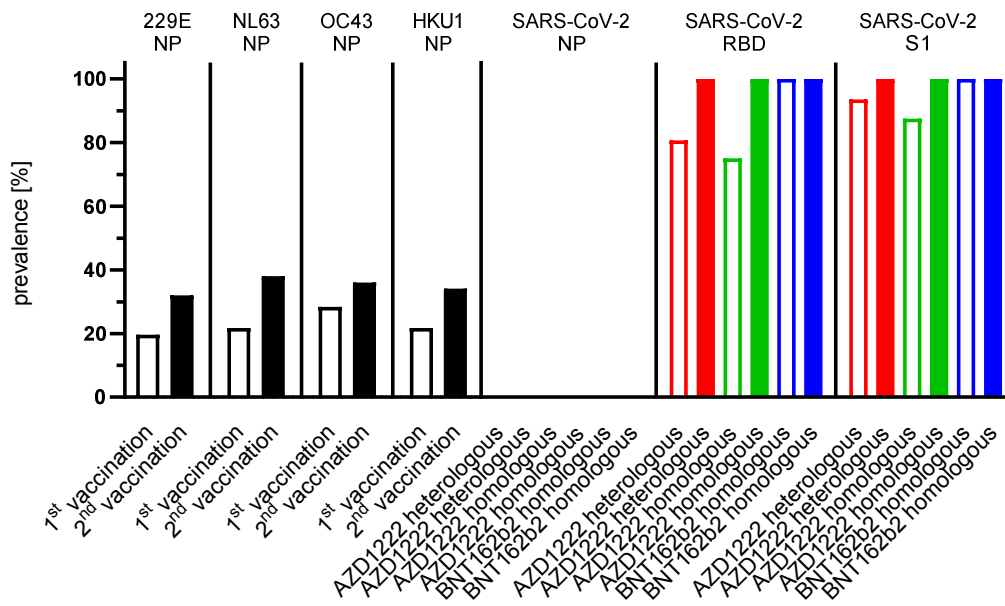

**Fig. S1:** Nucleoprotein (NP) specific immune response. Pattern of immunoglobuline G (IgG) reactivity against the separate NPs of seasonal human coronaviruses (HCoVs 229E, NL63, OC43, and HKU1) and the NP of SARS-CoV-2 as well as the Spike-protein subunit S1 and the receptor binding domain (RBD). For HCoVs, the prevalence of the different vaccination regimens is summarised after the first and second vaccination and given as a percentage. Reactivity was recorded after first (empty bars) and second immunisation (filled bars) with the vector vaccine AZD1222 or the messenger ribonucleic acid (mRNA)-based vaccines BNT162b2 or mRNA-1273.
